# Supplementary material for: Effects of Halogen Lamp and Traditional Sun Drying on the Volatile Compounds, Color Parameters, and Gel Texture of Gongliao Gelidium Seaweed
Source: MDPI journal article supplement (doi:10.3390/foods12244508), 2023-12-17
Supplement: s1 [file s1]

Supplementary Table S1. Correlation coefficients of color, texture, and sensory evaluation results of *Gelidium* seaweed

|             | Appearance | Color   | Texture  | Flavor   | Overall  | Fishy odor | L*      | a*     | b*      | Hardness | Springiness |
|-------------|------------|---------|----------|----------|----------|------------|---------|--------|---------|----------|-------------|
| Appearance  | 1          |         |          |          |          |            |         |        |         |          |             |
| Color       | 0.972**    | 1       |          |          |          |            |         |        |         |          |             |
| Texture     | 0.882*     | 0.770   | 1        |          |          |            |         |        |         |          |             |
| Flavor      | 0.949**    | 0.856*  | 0.980**  | 1        |          |            |         |        |         |          |             |
| Overall     | 0.933**    | 0.846*  | 0.989**  | 0.992**  | 1        |            |         |        |         |          |             |
| Fishy odor  | -0.953**   | -0.870* | -0.923** | -0.977** | -0.959** | 1          |         |        |         |          |             |
| L*          | 0.929**    | 0.899*  | 0.755    | 0.858*   | 0.804    | -0.878*    | 1       |        |         |          |             |
| a*          | -0.045     | 0.043   | -0.056   | -0.122   | -0.057   | 0.217      | -0.290  | 1      |         |          |             |
| b*          | 0.958**    | 0.937** | 0.795    | 0.892*   | 0.858*   | -0.928**   | 0.971** | -0.297 | 1       |          |             |
| Hardness    | 0.945**    | 0.939** | 0.801    | 0.878*   | 0.858*   | -0.884*    | 0.945** | -0.247 | 0.981** | 1        |             |
| Springiness | 0.895*     | 0.802   | 0.883*   | 0.931**  | 0.894*   | -0.918**   | 0.935** | -0.398 | 0.931** | 0.922**  | 1           |

\* indicate significance at  $p < 0.05$

\*\* indicate significance at  $p < 0.01$

Supplementary Table S2. Volatile compounds of Fresh and untreated *Gelidium* seaweed

|    | Compound             | RI   | Concentration* (ng/ml) |
|----|----------------------|------|------------------------|
| 1  | acetic acid          | 600  | 46.9                   |
| 2  | hexanal              | 801  | 281                    |
| 3  | 2-hexenal            | 844  | 61.3                   |
| 4  | heptanal             | 895  | 499                    |
| 5  | 1-octen-3-ol         | 972  | 97.4                   |
| 6  | octanal              | 998  | 235                    |
| 7  | 3,5-octadien-2-ol    | 1037 | 62.3                   |
| 8  | 2,6-nonadienal       | 1148 | 43.3                   |
| 9  | $\beta$ -cyclocitral | 1213 | 46.2                   |
| 10 | 2-decenal            | 1241 | 28.5                   |
| 11 | $\alpha$ -ionone     | 1412 | 254                    |
| 12 | $\beta$ -ionone      | 1471 | 379                    |

\*Semi-quantitated

Supplementary Table S3. Volatile compounds of dried *Gelidium* seaweed (three washing and sun drying cycle)

|    | Compound               | RI   | Concentration* (ng/ml) |
|----|------------------------|------|------------------------|
| 1  | hexanal                | 824  | 178                    |
| 2  | heptanal               | 899  | 92.3                   |
| 3  | 2-heptenal             | 950  | 336                    |
| 4  | octanal                | 1001 | 295                    |
| 5  | 2,4-heptadienal        | 1010 | 200                    |
| 6  | 3-octen-2-one          | 1040 | 250                    |
| 7  | 2-octenal              | 1061 | 307                    |
| 8  | 1-octanol              | 1073 | 191                    |
| 9  | 3,5-octadien-2-one     | 1089 | 94.4                   |
| 10 | nonanal                | 1103 | 332                    |
| 11 | 2,6-nonadienal         | 1151 | 28.4                   |
| 12 | 2-nonenal              | 1160 | 98.3                   |
| 13 | 2,4-nonadienal         | 1192 | 185                    |
| 14 | $\beta$ -cyclocitral   | 1217 | 25.0                   |
| 15 | 2-decenal              | 1245 | 206                    |
| 16 | 2,4-decadienal         | 1290 | 179                    |
| 17 | 2-undecenal            | 1359 | 64.3                   |
| 18 | dodecanal              | 1397 | 25.0                   |
| 19 | $\alpha$ -ionone       | 1412 | 63.5                   |
| 20 | $\beta$ -ionone        | 1470 | 22.4                   |
| 21 | epoxy- $\beta$ -ionone | 1479 | 28.1                   |
| 22 | 1-pentadecene          | 1484 | 21.9                   |
| 23 | tridecanal             | 1498 | 11.3                   |
| 24 | octadecenal            | 1559 | 25.2                   |
| 25 | tetradecanal           | 1599 | 27.6                   |

\*Semi-quantitated

Supplementary Table S4. Volatile compounds of dried *Gelidium* seaweed (seven washing and drying cycles)

|    | Compound               | RI   | Concentration* (ng/ml) |
|----|------------------------|------|------------------------|
| 1  | hexanal                | 801  | 138                    |
| 2  | 2-hexenal              | 844  | 29.6                   |
| 3  | heptanal               | 895  | 22.3                   |
| 4  | 2-heptenal             | 950  | 177                    |
| 5  | octanal                | 998  | 287                    |
| 6  | 3-octen-2-one          | 1033 | 55.3                   |
| 7  | 2-octenal              | 1057 | 61.6                   |
| 8  | 1-octanol              | 1070 | 49.5                   |
| 9  | nonanone               | 1087 | 8.90                   |
| 10 | nonanal                | 1100 | 252                    |
| 11 | 2-nonenal              | 1142 | 137                    |
| 12 | nonadienal             | 1188 | 108                    |
| 13 | decanal                | 1198 | 46.3                   |
| 14 | $\beta$ -cyclocitral   | 1213 | 15.4                   |
| 15 | 2-decenal              | 1241 | 645                    |
| 16 | 2,4-decadienal         | 1286 | 150                    |
| 17 | undecanal              | 1298 | 56.0                   |
| 18 | 2-undecenal            | 1354 | 103                    |
| 19 | undecanol              | 1363 | 32.3                   |
| 20 | dodecanal              | 1397 | 61.7                   |
| 21 | dodecenal              | 1456 | 69.0                   |
| 22 | octadecenal            | 1462 | 28.2                   |
| 23 | epoxy- $\beta$ -ionone | 1473 | 10.1                   |
| 24 | pentadecene            | 1481 | 68.7                   |
| 25 | tridecanal             | 1498 | 54.0                   |
| 26 | octadecenal            | 1559 | 25.7                   |
| 27 | tetradecanal           | 1599 | 12.1                   |

\*Semi-quantitated.

Supplementary Table S5. Volatile compounds of *Gelidium* seaweed (seven washing and halogen lamp drying cycles)

|    | Compound               | RI   | Concentration* (ng/ml) |
|----|------------------------|------|------------------------|
| 1  | hexanal                | 801  | 233                    |
| 2  | 2-hexenal              | 844  | 31.8                   |
| 3  | 2,4-hexadien-1-ol      | 860  | 7.45                   |
| 4  | 2-heptanone            | 881  | 12.1                   |
| 5  | heptanal               | 895  | 35.6                   |
| 6  | 2-heptenal             | 945  | 281                    |
| 7  | 1-octen-3-one          | 969  | 44.2                   |
| 8  | 1-octen-3-ol           | 972  | 29.9                   |
| 9  | 2,4-heptadienal        | 990  | 184                    |
| 10 | octanal                | 998  | 169                    |
| 11 | 3-octen-2-one          | 1033 | 315                    |
| 12 | 2-octenal              | 1057 | 235                    |
| 13 | 3,5-octadien-2-one     | 1067 | 44.8                   |
| 14 | 1-octanol              | 1070 | 143                    |
| 15 | 3,5-octadien-2-one     | 1086 | 53.7                   |
| 16 | nonanal                | 1099 | 292                    |
| 17 | 2-nonenal              | 1142 | 77.8                   |
| 18 | 2,6-nonadienal         | 1148 | 14.3                   |
| 19 | decanal                | 1198 | 20.8                   |
| 20 | 2,4-nonadienal         | 1188 | 374                    |
| 21 | $\beta$ -cyclocitral   | 1213 | 18.2                   |
| 22 | 2-decenal              | 1241 | 112                    |
| 23 | 2,4-decadienal         | 1286 | 284                    |
| 24 | undecanal              | 1298 | 6.77                   |
| 25 | dodecanal              | 1397 | 23.3                   |
| 26 | $\alpha$ -ionone       | 1412 | 35.7                   |
| 27 | $\beta$ -ionone        | 1413 | 14.4                   |
| 28 | epoxy- $\beta$ -ionone | 1473 | 18.2                   |
| 29 | tridecanal             | 1498 | 34.3                   |

\*Semi-quantited.

Supplementary Table S6. Volatile compounds of *Gelidium* seaweed (nine washing and halogen lamp drying cycles)

|    | Compound             | RI   | Concentration* (ng/ml) |
|----|----------------------|------|------------------------|
| 1  | hexanal              | 796  | 156                    |
| 2  | 2-hexenal            | 844  | 26.7                   |
| 3  | 2-heptanone          | 881  | 5.41                   |
| 4  | heptanal             | 895  | 22.3                   |
| 5  | 2-heptenal           | 945  | 246                    |
| 6  | 1-octen-3-one        | 969  | 17.4                   |
| 7  | 1-octen-3-ol         | 972  | 13.1                   |
| 8  | octanal              | 998  | 138                    |
| 9  | 2,4-heptadienal      | 1008 | 112                    |
| 10 | 3-octen-2-one        | 1033 | 147                    |
| 11 | 3,5-octadien-2-one   | 1036 | 8.98                   |
| 12 | 2-octenal            | 1057 | 179                    |
| 13 | 1-octanol            | 1070 | 45.4                   |
| 14 | 3,5-octadien-2-one   | 1089 | 20.7                   |
| 15 | nonanal              | 1098 | 286                    |
| 16 | 2-nonenal            | 1142 | 161                    |
| 17 | 2,6-nonadienal       | 1147 | 4.76                   |
| 18 | 2,4-nonadienal       | 1188 | 302                    |
| 19 | decanal              | 1198 | 37.8                   |
| 20 | $\beta$ -cyclocitral | 1212 | 8.10                   |
| 21 | 2-decenal            | 1241 | 474                    |
| 22 | 2,4-decadienal       | 1286 | 184                    |
| 23 | undecanal            | 1298 | 21.2                   |
| 24 | 2-undecenal          | 1354 | 21.3                   |
| 25 | undecanal            | 1397 | 36.6                   |
| 26 | $\alpha$ -ionone     | 1412 | 11.9                   |
| 27 | 1-pentadecene        | 1480 | 36.9                   |
| 28 | tridecanal           | 1498 | 36.6                   |

\*Semi-quantitated.

Supplementary Table S7. Volatile compounds of *Gelidium* seaweed (twelve washing and halogen lamp drying cycles)

|    | Compound             | RI   | Concentration* (ng/ml) |
|----|----------------------|------|------------------------|
| 1  | hexanal              | 801  | 142                    |
| 2  | 2-hexenal            | 844  | 22.3                   |
| 3  | heptanal             | 895  | 15.0                   |
| 4  | 1-ccten-3-one        | 969  | 7.36                   |
| 5  | octanal              | 998  | 139                    |
| 6  | 3-octen-2-one        | 1033 | 99.5                   |
| 7  | 2-octenal            | 1057 | 110                    |
| 8  | 1-octanol            | 1070 | 14.8                   |
| 9  | nonanal              | 1099 | 305                    |
| 10 | 2-nonenal            | 1142 | 214                    |
| 11 | decanal              | 1198 | 59.5                   |
| 12 | 2,4-nonadienal       | 1188 | 264                    |
| 13 | $\beta$ -cyclocitral | 1213 | 7.43                   |
| 14 | 2-decenal            | 1241 | 526                    |
| 15 | 2,4-decadienal       | 1286 | 126                    |
| 16 | undecanal            | 1298 | 47.6                   |
| 17 | 2-undecenal          | 1354 | 95.5                   |
| 18 | dodecanal            | 1397 | 43.2                   |
| 19 | $\alpha$ -ionone     | 1412 | 12.2                   |
| 20 | 2-dodecenal          | 1456 | 60.4                   |
| 21 | 1-pentadecene        | 1480 | 64.1                   |
| 22 | tridecanal           | 1498 | 42.2                   |

\*Semi-quantitated.
